# Supplementary material for: Antenatal Ureaplasma Infection Causes Colonic Mucus Barrier Defects: Implications for Intestinal Pathologies
Source: MDPI journal article supplement (doi:10.3390/ijms25074000), 2024-04-03
Supplement: s1 [file s1]

## Supplementary Material

Supplementary Table S1 Antibodies used

|                                                                                                                                     |
|-------------------------------------------------------------------------------------------------------------------------------------|
| <b>Primary antibodies used:</b>                                                                                                     |
| polyclonal rabbit anti-mucin 2 (MUC2c3)<br>kindly provided by Gunnar Hansson, University of Gothenburg, Gothenburg, Sweden          |
| polyclonal rabbit anti-immature mucin 2 (PH 489)<br>kindly provided by Gunnar Hansson, University of Gothenburg, Gothenburg, Sweden |
| polyclonal rabbit anti-SPDEF<br>(ab197375, Abcam, Cambridge, United Kingdom)                                                        |
| monoclonal rabbit anti-BiP<br>(C50B12 #3177 Cell Signaling Technology, Danvers, MA, USA)                                            |
| monoclonal mouse anti-CHOP<br>(9C8, MA1-250, Invitrogen, Carlsbad, CA, USA)                                                         |
| <b>Secondary antibodies used:</b>                                                                                                   |
| biotin-conjugated polyclonal swine anti-rabbit<br>(E0353, DakoCytomation, Glostrup, Denmark) (MUC2, iMUC2, SPDEF, BiP)              |
| biotin-conjugated polyclonal rabbit anti-mouse<br>(E0413, DakoCytomation, Glostrup, Denmark) (CHOP)                                 |

Supplementary Table S2 Sequences of primers used

| Primer                    | Forward                       | Reverse                      |
|---------------------------|-------------------------------|------------------------------|
| <b>Housekeeping genes</b> |                               |                              |
| ovRPS15                   | 5'-CGAGATGGTGGGCAGCAT-3'      | 5'-GCTTGATTTCACCTGGTTGA-3'   |
| GAPDH                     | 5'-ATGCCTCCTGCACCACCA-3'      | 5'-ATGCCCTCCACGATGCCAA-3'    |
| YWHAZ                     | 5'-TGAAGTCCCCTGAGAAAGCC-3'    | 5'-TCCGATGTCCACAATGTCAAGT-3' |
| <b>Genes of interest</b>  |                               |                              |
| GCLC                      | 5'-CCCGATGAAGCCATCAACAAG-3'   | 5'-TCTTGTCTTAAAGATGGGCACG-3' |
| HMOX1                     | 5'-CCGCCTTCCTGCTCAACATC-3'    | 5'-GGGAGCCGAGTCTTGTGCC-3'    |
| TXNRD1                    | 5'-TGGGGAAGAAAATGTTGAGGTTT-3' | 5'-GACCCAGTATGTGGAAGCCC-3'   |

Abbreviations: ovRPS15: ovine ribosomal protein S15, GAPDH, glyceraldehyde 3-phosphate dehydrogenase, YWHAZ: 14-3-3 protein zeta/delta, GCLC: glutamate-cysteine ligase catalytic subunit, HMOX1: heme oxygenase 1; TXNRD1: thioredoxin reductase 1.

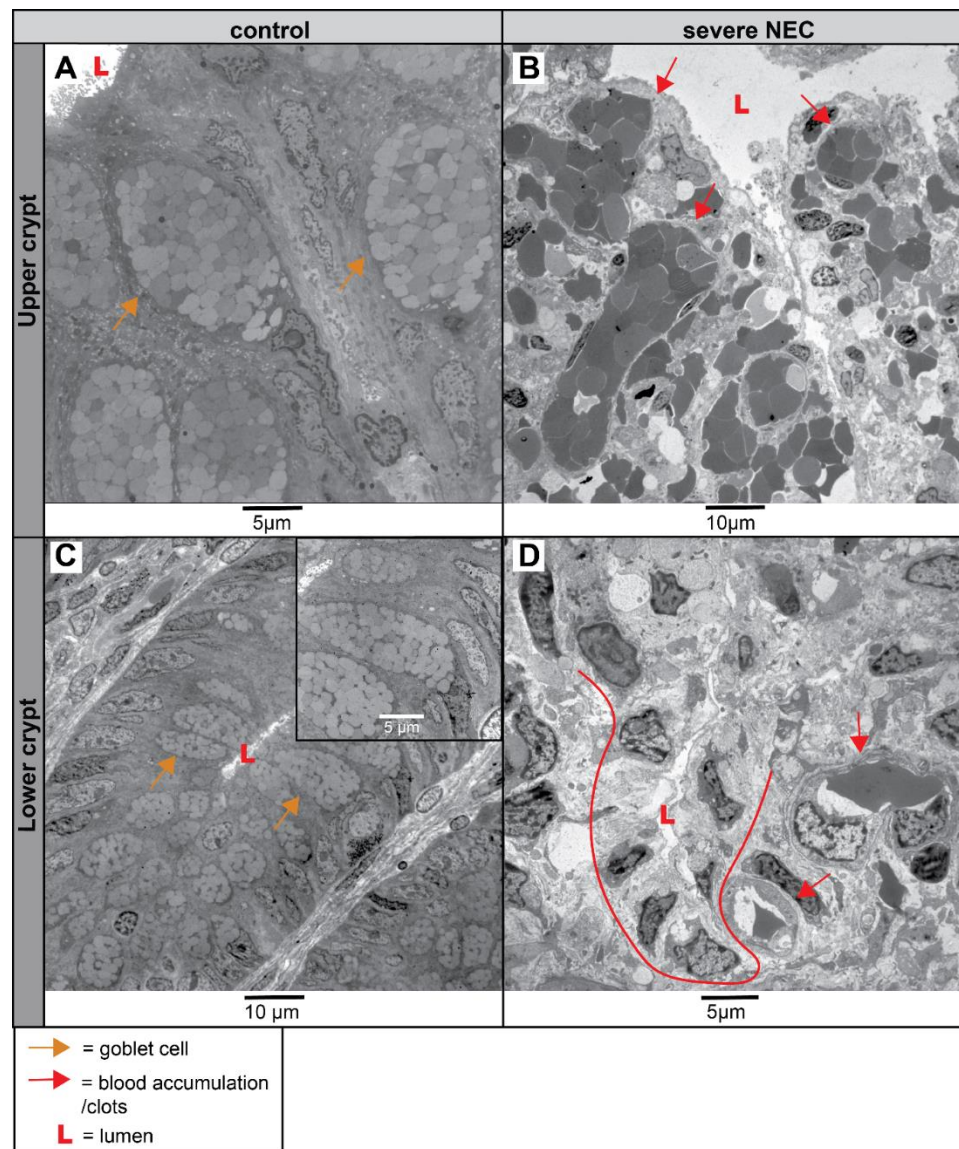

**Supplementary Figure S1.** Cellular morphology and tissue organisation of colonic biopsies of a NEC patient with severe damage and controls imaged with TEM. Whereas the upper crypt of control infants consists of organized and identifiable goblet cells and colonocytes (A, N=2), the tissue organization and cellular morphology of the upper colonic crypt in the NEC patient is completely and severely damaged; mainly blood accumulation and infiltration (red arrows) is seen in this severely injured and necrotic tissue (B, N=1). In the lower crypt of controls, the organization and morphology of both colonocytes and goblet cells (insert) are normal (C, N=2). The tissue and cellular organization is completely disrupted in the NEC patient; no recognizable lower crypt structure (red line) or cellular morphology is observed; small capillaries (red arrows) are present (D, N=1). Scale bars indicate 5µm and 10µm respectively. Abbreviations: GA: gestational age; L: lumen; NEC: necrotizing enterocolitis; TEM: transmission electron microscopy
